# Supplementary material for: Assessing the Interfacial Dynamic Modulus of Biological Composites
Source: MDPI journal article supplement (doi:10.3390/ma14123428), 2021-06-21
Supplement: s1 [file s1]

# Assessing the Interfacial Dynamic Modulus of Biological Composites

Yaniv Shelef <sup>1,†</sup>, Avihai Yosef Uzan <sup>1,†</sup>, Ofer Braunshtein <sup>1,2</sup> and Benny Bar-On <sup>1,\*</sup>

<sup>1</sup> Department of Mechanical Engineering, Ben-Gurion University of the Negev, Beer Sheva 84105, Israel; shelef@post.bgu.ac.il (Y.S.); uzanav@post.bgu.ac.il (A.Y.U.); ofbr@post.bgu.ac.il (O.B.)

<sup>2</sup> Nuclear Research Center-Negev, P.O. Box 9001, Beer-Sheva 84190, Israel

\* Correspondence: bbo@bgu.ac.il

† Authors with equal contributions.

## S1. Derivation of the analytical formulae

We consider a biocomposite segment of length  $L_c$  and a dynamic modulus  $E_c^* = E_c \cdot e^{i \cdot \delta_c}$ , which includes a pair of elastic reinforcements of elastic modulus  $E_f$  — connected by a viscoelastic interface of length  $L_i$  and a dynamic modulus  $E_i^* = E_i \cdot e^{j \cdot \delta_i}$  (Figure 1b, main text). Using the inverse rule-of-mixtures,  $E_c^*$  links to  $E_f$  and  $E_i^*$  via the relative length of the interface in the biocomposite segment ( $L_i/L_c$ ):

$$\frac{1}{E_c^*} = \frac{1 - L_i/L_c}{E_f} + \frac{L_i/L_c}{E_i^*} \quad (S1)$$

By rearranging Equation (S1), we obtain:

$$E_i^* \cdot [E_f - E_c^* \cdot (1 - L_i/L_c)] = E_c^* \cdot E_f \cdot L_i/L_c \quad (S2)$$

Next, we express the dynamic moduli of the interfacial region and the composite segment via their substitute real and imaginary parts,  $E_i^* = E_i' + j \cdot E_i''$  and  $E_c^* = E_c' + j \cdot E_c''$ , substitute them into Equation (S2), and solve the real and imaginary parts, respectively:

$$E_i' \cdot E_f - E_i' \cdot E_c' \cdot (1 - L_i/L_c) + E_i'' \cdot E_c'' \cdot (1 - L_i/L_c) = E_c' \cdot E_f \cdot L_i/L_c \quad (S3)$$

$$E_c'' \cdot E_i' \cdot (1 - L_i/L_c) + E_i'' \cdot E_f - E_i'' \cdot E_c' \cdot (1 - L_i/L_c) = E_c'' \cdot E_f \cdot L_i/L_c \quad (S4)$$

Then, we solve Equations (S3a) and (S3b) for  $E_i'$  and  $E_i''$  and obtain:

$$E_i' = \frac{E_f \cdot L_i/L_c \cdot [(E_c'^2 + E_c''^2) \cdot (L_i/L_c - 1) + E_c' \cdot E_f]}{E_c'^2 \cdot (L_i/L_c - 1)^2 + 2 \cdot E_c' \cdot E_f \cdot (L_i/L_c - 1) + E_c''^2 \cdot (L_i/L_c - 1)^2 + E_f^2} \quad (S5)$$

$$E_i'' = \frac{E_c'' \cdot E_f^2 \cdot L_i/L_c}{E_c'^2 \cdot (L_i/L_c - 1)^2 + 2 \cdot E_c' \cdot E_f \cdot (L_i/L_c - 1) + E_c''^2 \cdot (L_i/L_c - 1)^2 + E_f^2} \quad (S6)$$

Next, express the modulus magnitude of the interfacial region via  $E_i = \sqrt{E_i'^2 + E_i''^2}$ , use the relationships  $E_c = \sqrt{E_c'^2 + E_c''^2}$  and  $E_c' = E_c \cdot \sqrt{1 + \tan^2 \delta_c}$ , and rearrange to obtain Equation (2) at the main text:

$$E_i = E_c \cdot \frac{L_i}{L_c} \cdot \frac{1}{\sqrt{1 - 2 \cdot \left(1 - \frac{L_i}{L_c}\right) \cdot \left(\frac{E_c}{E_f}\right) \cdot \frac{1}{\sqrt{1 + \tan^2 \delta_c}} + \left(\frac{E_c}{E_f}\right)^2 \cdot \left(1 - \frac{L_i}{L_c}\right)^2}} \quad (S7)$$

Similarly, we express the loss coefficient of the interfacial region via  $E_i = E_i''/E_i'$ , use again the relationship  $E_c' = E_c \cdot \sqrt{1 + \tan^2 \delta_c}$ , and rearrange to obtain Equation (3) at the main text:

$$\tan \delta_i = \tan \delta_c \cdot \frac{1}{1 - \frac{E_c}{E_f} \cdot \left(1 - \frac{L_i}{L_c}\right) \cdot \sqrt{1 + \tan^2 \delta_c}} \quad (\text{S8})$$

Next, we consider  $\tan \delta_c \leq 1/2$ , for which  $\sqrt{1 + \tan^2 \delta_c} \approx 1 + \frac{1}{2} \cdot \tan^2 \delta_c$  and  $\frac{1}{\sqrt{1 + \tan^2 \delta_c}} \approx 1 - \frac{1}{2} \cdot \tan^2 \delta_c$ , and introduce these approximations into Equations (S7) and (S8):

$$E_i = E_c \cdot \frac{L_i}{L_c} \cdot \frac{1}{\sqrt{\left[1 - \frac{E_c}{E_f} \cdot \left(1 - \frac{L_i}{L_c}\right)\right]^2 + \left(1 - \frac{L_i}{L_c}\right) \cdot \left(\frac{E_c}{E_f}\right) \cdot \tan^2 \delta_c}} \quad (\text{S9})$$

$$\tan \delta_i = \tan \delta_c \cdot \frac{1}{\left[1 - \frac{E_c}{E_f} \cdot \left(1 - \frac{L_i}{L_c}\right)\right] - \frac{1}{2} \cdot \frac{E_c}{E_f} \cdot \left(1 - \frac{L_i}{L_c}\right) \cdot \tan^2 \delta_c} \quad (\text{S10})$$

Rearranging:

$$E_i = E_c \cdot \frac{L_i}{L_c} \cdot \frac{1}{1 - \frac{E_c}{E_f} \cdot \left(1 - \frac{L_i}{L_c}\right)} \cdot \frac{1}{\sqrt{1 + \frac{\left(1 - \frac{L_i}{L_c}\right) \cdot \left(\frac{E_c}{E_f}\right) \cdot \tan^2 \delta_c}{\left[1 - \frac{E_c}{E_f} \cdot \left(1 - \frac{L_i}{L_c}\right)\right]^2}}} \quad (\text{S11})$$

$$\tan \delta_i = \tan \delta_c \cdot \frac{1}{1 - \frac{E_c}{E_f} \cdot \left(1 - \frac{L_i}{L_c}\right)} \cdot \frac{1}{1 - \frac{\frac{1}{2} \cdot \frac{E_c}{E_f} \cdot \left(1 - \frac{L_i}{L_c}\right) \cdot \tan^2 \delta_c}{1 - \frac{E_c}{E_f} \cdot \left(1 - \frac{L_i}{L_c}\right)}} \quad (\text{S12})$$

We consider  $0 < \frac{L_i}{L_c} \cdot \frac{E_c}{E_f} \leq \frac{1}{4}$  and  $\tan \delta_c \leq \frac{1}{2}$ , use Taylor's expansions for the denominators of the right-hand terms in Equations (S11) and (S12), and identify that:

$$\sqrt{1 + \frac{\left(1 - \frac{L_i}{L_c}\right) \cdot \left(\frac{E_c}{E_f}\right) \cdot \tan^2 \delta_c}{\left[1 - \frac{E_c}{E_f} \cdot \left(1 - \frac{L_i}{L_c}\right)\right]^2}} \leq \sqrt{1 + \frac{\left(\frac{E_c}{E_f}\right) \cdot \tan^2 \delta_c}{\left(1 - \frac{E_c}{E_f}\right)^2}} \leq \sqrt{1 + \frac{1}{9}} \sim 1 \quad (\text{S13})$$

$$1 - \frac{\frac{1}{2} \cdot \frac{E_c}{E_f} \cdot \left(1 - \frac{L_i}{L_c}\right) \cdot \tan^2 \delta_c}{1 - \frac{E_c}{E_f} \cdot \left(1 - \frac{L_i}{L_c}\right)} \leq 1 - \frac{\frac{1}{2} \cdot \frac{E_c}{E_f} \cdot \tan^2 \delta_c}{1 - \frac{E_c}{E_f}} \leq 1 - \frac{1}{28} \sim 1 \quad (\text{S14})$$

Consequently, Equations (S11) and (S12) reduce to Equations (3) and (4) at the main text:

$$E_i = E_c \cdot \frac{L_i}{L_c} \cdot \frac{1}{1 - \frac{E_c}{E_f} \cdot \left(1 - \frac{L_i}{L_c}\right)} \quad (\text{S15})$$

$$\tan \delta_i = \tan \delta_c \cdot \frac{1}{1 - \frac{E_c}{E_f} \cdot \left(1 - \frac{L_i}{L_c}\right)} \quad (\text{S16})$$

**Table S1.** Summary of DMA simulations results, shown in Figure 2 in the main text.

| <i>Input DMA-FE</i> |           |           |                 | <i>Output DMA-FE</i> |                 | $k_E$ (Eq. 4) | <i>Symbol</i> |
|---------------------|-----------|-----------|-----------------|----------------------|-----------------|---------------|---------------|
| $E_f$ (GPa)         | $E_i/E_f$ | $L_i/L_c$ | $\tan \delta_i$ | $E_c$ (GPa)          | $\tan \delta_c$ |               |               |
| 0.1                 | 0.053     | 0.05      | 0               | 0.0526               | 0               | 0.1           | ○             |
| 1                   | 0.053     | 0.05      | 0               | 0.526                | 0               | 0.1           | ○             |
| 10                  | 0.053     | 0.05      | 0               | 5.26                 | 0               | 0.1           | ○             |
| 100                 | 0.053     | 0.05      | 0               | 52.6                 | 0               | 0.1           | ○             |
| 0.1                 | 0.011     | 0.09      | 0               | 0.01                 | 0               | 0.1           | □             |
| 1                   | 0.011     | 0.09      | 0               | 0.10                 | 0               | 0.1           | □             |
| 10                  | 0.011     | 0.09      | 0               | 1.01                 | 0               | 0.1           | □             |
| 100                 | 0.011     | 0.09      | 0               | 10.1                 | 0               | 0.1           | □             |
| 0.1                 | 0.053     | 0.05      | 0.5             | 0.0526               | 0.24            | 0.1           | +             |
| 1                   | 0.053     | 0.05      | 0.5             | 0.526                | 0.24            | 0.1           | +             |
| 10                  | 0.053     | 0.05      | 0.5             | 5.26                 | 0.24            | 0.1           | +             |
| 100                 | 0.053     | 0.05      | 0.5             | 52.6                 | 0.24            | 0.1           | +             |
| 0.1                 | 0.011     | 0.09      | 0.5             | 0.01                 | 0.45            | 0.1           | *             |
| 1                   | 0.011     | 0.09      | 0.5             | 0.10                 | 0.45            | 0.1           | *             |
| 10                  | 0.011     | 0.09      | 0.5             | 1.01                 | 0.45            | 0.1           | *             |
| 100                 | 0.011     | 0.09      | 0.5             | 10.1                 | 0.45            | 0.1           | *             |
| 0.1                 | 0.177     | 0.15      | 0               | 0.0588               | 0               | 0.3           | ○             |
| 1                   | 0.177     | 0.15      | 0               | 0.588                | 0               | 0.3           | ○             |
| 10                  | 0.177     | 0.15      | 0               | 5.88                 | 0               | 0.3           | ○             |
| 100                 | 0.177     | 0.15      | 0               | 58.8                 | 0               | 0.3           | ○             |
| 0.1                 | 0.067     | 0.25      | 0               | 0.0222               | 0               | 0.3           | □             |
| 1                   | 0.067     | 0.25      | 0               | 0.222                | 0               | 0.3           | □             |
| 10                  | 0.067     | 0.25      | 0               | 2.22                 | 0               | 0.3           | □             |
| 100                 | 0.067     | 0.25      | 0               | 22.2                 | 0               | 0.3           | □             |
| 0.1                 | 0.177     | 0.15      | 0.5             | 0.0588               | 0.24            | 0.3           | +             |
| 1                   | 0.177     | 0.15      | 0.5             | 0.588                | 0.24            | 0.3           | +             |
| 10                  | 0.177     | 0.15      | 0.5             | 5.88                 | 0.24            | 0.3           | +             |
| 100                 | 0.177     | 0.15      | 0.5             | 58.8                 | 0.24            | 0.3           | +             |
| 0.1                 | 0.067     | 0.25      | 0.5             | 0.0222               | 0.41            | 0.3           | *             |
| 1                   | 0.067     | 0.25      | 0.5             | 0.222                | 0.41            | 0.3           | *             |
| 10                  | 0.067     | 0.25      | 0.5             | 2.22                 | 0.41            | 0.3           | *             |
| 100                 | 0.067     | 0.25      | 0.5             | 22.2                 | 0.41            | 0.3           | *             |
| 0.1                 | 0.199     | 0.75      | 0               | 0.025                | 0               | 0.8           | ○             |
| 1                   | 0.199     | 0.75      | 0               | 0.25                 | 0               | 0.8           | ○             |
| 10                  | 0.199     | 0.75      | 0               | 2.5                  | 0               | 0.8           | ○             |
| 100                 | 0.199     | 0.75      | 0               | 25                   | 0               | 0.8           | ○             |
| 0.1                 | 0.047     | 0.79      | 0               | 0.0059               | 0               | 0.8           | □             |
| 1                   | 0.047     | 0.79      | 0               | 0.059                | 0               | 0.8           | □             |
| 10                  | 0.047     | 0.79      | 0               | 0.59                 | 0               | 0.8           | □             |
| 100                 | 0.047     | 0.79      | 0               | 5.9                  | 0               | 0.8           | □             |
| 0.1                 | 0.067     | 0.75      | 0.5             | 0.025                | 0.47            | 0.8           | +             |
| 1                   | 0.067     | 0.75      | 0.5             | 0.25                 | 0.47            | 0.8           | +             |
| 10                  | 0.067     | 0.75      | 0.5             | 2.5                  | 0.47            | 0.8           | +             |
| 100                 | 0.067     | 0.75      | 0.5             | 25                   | 0.47            | 0.8           | +             |
| 0.1                 | 0.199     | 0.79      | 0.5             | 0.0059               | 0.49            | 0.8           | *             |
| 1                   | 0.199     | 0.79      | 0.5             | 0.059                | 0.49            | 0.8           | *             |

|     |       |      |     |      |      |     |   |
|-----|-------|------|-----|------|------|-----|---|
| 10  | 0.199 | 0.79 | 0.5 | 0.59 | 0.49 | 0.8 | * |
| 100 | 0.199 | 0.79 | 0.5 | 5.9  | 0.49 | 0.8 | * |

**Table S2.** Summary of DMA simulations results, shown in Figure 3 in the main text.

| <i>Input DMA-FE</i> |           |           |                 | <i>Output DMA-FE</i> |                 | $k_\delta$ (Eq. 5) | <i>Symbol</i> |
|---------------------|-----------|-----------|-----------------|----------------------|-----------------|--------------------|---------------|
| $E_f$ (GPa)         | $E_i/E_f$ | $L_i/L_c$ | $\tan \delta_i$ | $E_c$ (GPa)          | $\tan \delta_c$ |                    |               |
| 10                  | 0.05      | 0.5       | 0               | 0.95                 | 0               | 1.05               | ○             |
| 10                  | 0.05      | 0.5       | 0.2             | 0.95                 | 0.190           | 1.05               | ○             |
| 10                  | 0.05      | 0.5       | 0.4             | 0.95                 | 0.379           | 1.05               | ○             |
| 10                  | 0.015     | 0.75      | 0.1             | 1.9                  | 0.095           | 1.05               | □             |
| 10                  | 0.015     | 0.75      | 0.3             | 1.9                  | 0.285           | 1.05               | □             |
| 10                  | 0.015     | 0.75      | 0.5             | 1.9                  | 0.473           | 1.05               | □             |
| 10                  | 0.079     | 0.05      | 0               | 6.66                 | 0               | 2.5                | ○             |
| 10                  | 0.078     | 0.05      | 0.2             | 6.66                 | 0.079           | 2.5                | ○             |
| 10                  | 0.076     | 0.05      | 0.4             | 6.66                 | 0.157           | 2.5                | ○             |
| 10                  | 0.167     | 0.1       | 0.1             | 6.32                 | 0.040           | 2.5                | □             |
| 10                  | 0.165     | 0.1       | 0.3             | 6.32                 | 0.119           | 2.5                | □             |
| 10                  | 0.156     | 0.1       | 0.5             | 6.32                 | 0.194           | 2.5                | □             |
| 10                  | 0.04      | 0.01      | 0               | 8.1                  | 0               | 5                  | ○             |
| 10                  | 0.04      | 0.01      | 0.2             | 8.1                  | 0.039           | 5                  | ○             |
| 10                  | 0.04      | 0.01      | 0.4             | 8.1                  | 0.079           | 5                  | ○             |
| 10                  | 0.21      | 0.05      | 0.1             | 8.4                  | 0.020           | 5                  | □             |
| 10                  | 0.20      | 0.05      | 0.3             | 8.4                  | 0.059           | 5                  | □             |
| 10                  | 0.19      | 0.05      | 0.5             | 8.4                  | 0.098           | 5                  | □             |

**Table S3.** Summary of the DMA simulation results for the zigzag-shaped interfaces and the corresponding back-calculations of  $E_i$  and  $\tan \delta_i$  via Equations (4) and (5), where  $E_m = 1$ ,  $E_f/E_m = 10$ , and  $\tan \delta_m = 1/2$

| <i>Input DMA-FE</i> |           |           | <i>Output DMA-FE</i> |                 |               | <i>Back-Calculations</i> |                    |                 |
|---------------------|-----------|-----------|----------------------|-----------------|---------------|--------------------------|--------------------|-----------------|
| $\theta$ [°]        | $L_i/L_m$ | $L_i/L_c$ | $E_c/E_m$            | $\tan \delta_c$ | $k_E$ (Eq. 4) | $E_i/E_m$                | $k_\delta$ (Eq. 5) | $\tan \delta_i$ |
| 3.8                 | 1.13      | 0.1       | 6.1                  | 0.202           | 0.22          | 1.34                     | 2.24               | 0.453           |
|                     |           | 1         | 1.22                 | 0.462           | 1             | 1.22                     | 1                  | 0.462           |
| 11.4                | 1.40      | 0.1       | 6.6                  | 0.175           | 0.25          | 1.65                     | 2.48               | 0.434           |
|                     |           | 1         | 1.49                 | 0.448           | 1             | 1.49                     | 1                  | 0.448           |
| 18.9                | 1.68      | 0.1       | 7.0                  | 0.153           | 0.27          | 1.89                     | 2.72               | 0.416           |
|                     |           | 1         | 1.74                 | 0.432           | 1             | 1.74                     | 1                  | 0.432           |
| 26.5                | 2.00      | 0.1       | 7.4                  | 0.134           | 0.30          | 2.22                     | 2.96               | 0.397           |
|                     |           | 1         | 2.00                 | 0.413           | 1             | 2.00                     | 1                  | 0.413           |
| 34.1                | 2.35      | 0.1       | 7.7                  | 0.118           | 0.32          | 2.46                     | 3.22               | 0.380           |
|                     |           | 1         | 2.30                 | 0.394           | 1             | 2.30                     | 1                  | 0.394           |
| 41.7                | 2.78      | 0.1       | 8.0                  | 0.102           | 0.35          | 2.80                     | 3.53               | 0.360           |
|                     |           | 1         | 2.68                 | 0.372           | 1             | 2.68                     | 1                  | 0.372           |
| 49.3                | 3.33      | 0.1       | 8.3                  | 0.085           | 0.40          | 3.32                     | 3.98               | 0.338           |
|                     |           | 1         | 3.20                 | 0.343           | 1             | 3.20                     | 1                  | 0.343           |
| 56.8                | 4.06      | 0.1       | 8.7                  | 0.064           | 0.47          | 4.09                     | 4.66               | 0.298           |
|                     |           | 1         | 3.98                 | 0.299           | 1             | 3.98                     | 1                  | 0.299           |
| 60.6                | 4.55      | 0.1       | 8.9                  | 0.052           | 0.51          | 4.54                     | 5.14               | 0.267           |
|                     |           | 1         | 3.98                 | 0.299           | 1             | 3.98                     | 1                  | 0.299           |
| 64.4                | 5.17      | 0.1       | 9.2                  | 0.040           | 0.57          | 5.24                     | 5.75               | 0.230           |
|                     |           | 1         | 5.22                 | 0.228           | 1             | 5.22                     | 1                  | 0.228           |
| 68.2                | 6         | 0.1       | 9.4                  | 0.028           | 0.65          | 6.11                     | 6.47               | 0.181           |
|                     |           | 1         | 6.05                 | 0.180           | 1             | 6.05                     | 1                  | 0.180           |
| 72.0                | 7.16      | 0.1       | 9.6                  | 0.018           | 0.73          | 7.00                     | 7.29               | 0.131           |
|                     |           | 1         | 6.97                 | 0.128           | 1             | 6.97                     | 1                  | 0.128           |
